# Supplementary material
Source: publisher figshare collection journal article supplement (https://gsajournals.figshare.com/ndownloader/files/18045101)
Supplement: Supplementary file 1 [file 18045101]

## Sheet: Table S2
Table S2: Primers used to check gene conversions in males from c3g homozygous mothers.
Stock	Sequence
c3g7_1_F1	AAAGCGGGCAATACGAAAA
c3g7_1_R1	GGAGTGCCCAGATTCTCAAG
c3g5_3_F1	CCCAAGAAGCGACACATTG
c3g5_3_R1	CCGATTGTCACAAACTCTGC
c3g6_4_F1	GCCACTCCATGTTCTCTTCG
c3g6_4_R1	CACCCGTGATCAGATTGTCC
c3g6_7_F1	CCATTGTGAGATTTCATTCAGC
c3g6_7_R1	CGAGTGGAGCAAAGCAAAA
c3g7_6_F2	GCGGTGACGAACCAAAAATA
c3g7_6_R2	TGTTGTTTCTGTTGCCTTGG
c3g7_13_F1	TGGTTTCAATTGCCATCACT
c3g7_13_R1	TGCATGCCTGACTAATTGCT
c3g9_5_F1	AAAACATGCGGACGAACAC
c3g9_5_R1	AAGCGCTTATCGAATCAAAC
c3g9_6_F1	AACCCAATGCCACATCAGTT
c3g9_6_R1	TGAACTTATTGGCTTTCAATGG
c3g10_15_F1	TTGCTTGGTACGAATGTTGC
c3g10_15_R1	AAGTGGCCACAAGTGTGCT
